# Supplementary material for: Testing for deficient mismatch repair and microsatellite instability: A focused update
Source: PubMed Central journal article supplement (PMC10713762; doi:10.1007/s00292-023-01208-2), 2023-10-24
Supplement: 292_2023_1208_MOESM1_ESM.pdf [file 292_2023_1208_MOESM1_ESM.pdf]

Tab. S1: Frequency distribution of different constellations of findings in French Tumor Collective [10]

|                    | Classic dMMR findings                           | Unusual MMR-IHC findings |                                                |                                              |                                       |                                              |
|--------------------|-------------------------------------------------|--------------------------|------------------------------------------------|----------------------------------------------|---------------------------------------|----------------------------------------------|
|                    | MSI-H & MLH1/PMS2<br>or MSH2/MSH6 loss<br>n=496 | Total<br>n=89            | isolated PMS2 or<br>MSH6 loss<br>Group 1, n=53 | dMMR classic<br>& MSS/MSI-L<br>Group 2, n=16 | pMMR<br>& MSI-H/MSI-L<br>Group 3, n=5 | complex MMR<br>protein loss<br>Group 4, n=15 |
| Prevalence (total) | 85%                                             | 15%                      | 59.6%                                          | 17.9%                                        | 5.6%                                  | 16.9%                                        |
| Non-CRC            | 13.1%                                           | 32.6%                    | 26.4%                                          | 62.5%                                        | 20.0%                                 | 26.7%                                        |
| Genetic/LS         | 21.4%                                           | 44.9%                    | 45.3%                                          | 37.5%                                        | 53.3%                                 | 53.3%                                        |
| MLH1/PMS2          | 70-80%                                          | 16.8%                    | Group 2                                        | 11                                           | no loss of MMR<br>protein expression  | 5x all four MMR proteins                     |
| MSH2 / MSH6        | 20-30%                                          | 8.9%                     |                                                | 5                                            |                                       | 3x three MMR proteins                        |
| MSH6               | see unusual                                     | 38.2%                    | 32                                             | Group 1                                      |                                       | 2x non-heterodimer proteins                  |
| PMS2               |                                                 | 28.1%                    | 21                                             |                                              |                                       | 5x heterogeneous, unclear                    |
